# Supplementary material for: β-catenin activation down-regulates cell-cell junction-related genes and induces epithelial-to-mesenchymal transition in colorectal cancers
Source: PubMed Central journal article supplement (PMC6895046; doi:10.1038/s41598-019-54890-9), 2019-12-05

## **$\beta$ -catenin activation down-regulates cell-cell junction-related genes and induces epithelial-to-mesenchymal transition in colorectal cancers**

Won Kyu Kim<sup>1,2,3</sup>, Yujin Kwon<sup>1,2,3,4</sup>, Mi Jang<sup>2</sup>, Minhee Park<sup>1,2</sup>, Jiyeon Kim<sup>5</sup>, Suyeon Cho<sup>3,4</sup>, Dong Geon Jang<sup>1,6</sup>, Wook-Bin Lee<sup>3</sup>, Sang Hoon Jung<sup>3,4</sup>, Hye Jin Choi<sup>7</sup>, Byung Soh Min<sup>8</sup>, Tae Il Kim<sup>7</sup>, Sung Pil Hong<sup>9</sup>, Young-Ki Paik<sup>10</sup>, Hoguen Kim<sup>1,2,\*</sup>

Won Kyu Kim and Yujin Kwon equally contributed to this article.

<sup>1</sup>Brain Korea 21 PLUS Project for Medical Science

<sup>2</sup>Departments of Pathology, Yonsei University College of Medicine, Seoul 120-752, Korea

<sup>3</sup>Natural Product Research Center, Korea Institute of Science and Technology (KIST), Gangneung 25451, Korea

<sup>4</sup>Division of Bio-Medical Science & Technology, University of Science and Technology (UST), Daejeon 34113, Korea

<sup>5</sup>Department of Pharmacology, College of Medicine, The Catholic University of Korea, Seoul, 06591, Korea

<sup>6</sup>Department of Pharmacology, Yonsei University College of Medicine, Seoul 03722, Korea.

<sup>7</sup>Department of Internal medicine, Institute of Gastroenterology, Yonsei University College of Medicine, Seoul 120-752, Korea

<sup>8</sup>Department of Surgery, Yonsei University College of Medicine, Seoul 120-752, Korea

<sup>9</sup>Department of Surgery and Cancer, Imperial College London, London, W120NN, UK

<sup>10</sup>Department of Biochemistry, College of Life Science and Biotechnology, Yonsei University, Seoul 120-752, Korea

**\*Corresponding author:**

Hoguen Kim, M.D., Ph.D.

Professor of Pathology

Yonsei University College of Medicine, Seoul 120-752, Korea

Tel: +82 2 2228 1761, Fax: +82 2 363 5263

e-mail: [hkyonseu@yuhs.ac](mailto:hkyonseu@yuhs.ac)

## Supplementary Information

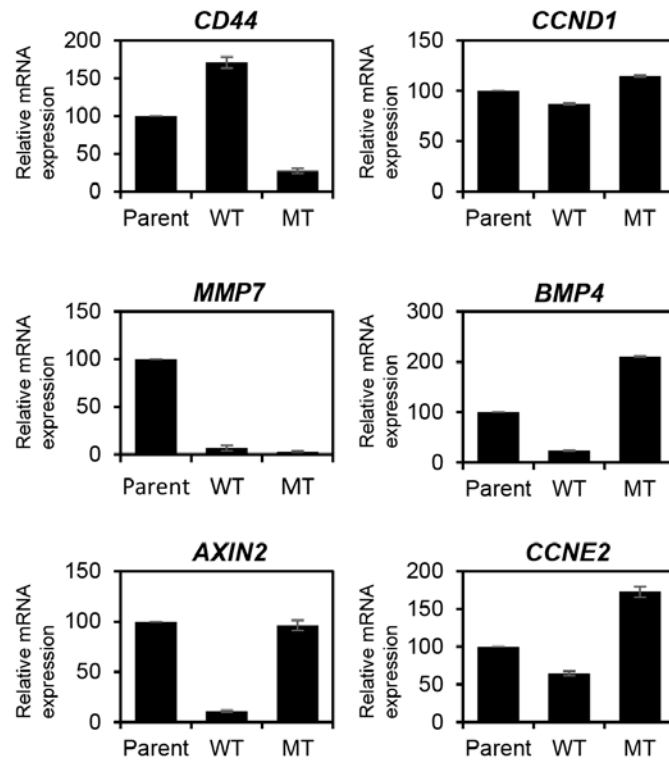

**Supplementary Figure S1.** qPCR analysis of Wnt/ $\beta$ -catenin signaling target genes, *CD44*, *CCND1*, *MMP7*, *BMP4*, *AXIN2*, and *CCNE2* in HCT116-P, HCT116-WT, and HCT116-MT cells. Error bars represent the standard deviation (SD) of the mean of two independent experiments.

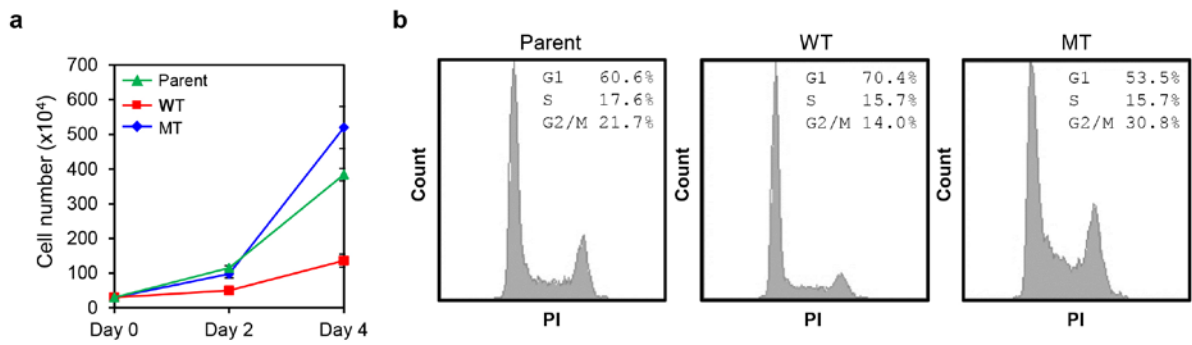

**Supplementary Figure S2.**  $\beta$ -catenin activation promotes cell cycle upregulation and cell proliferation. **(a)** Cell proliferation assay performed on HCT116 cells containing a wild-type (WT)  $\beta$ -catenin allele (HCT116-WT, WT), a mutant  $\beta$ -catenin allele (HCT116-MT, MT), or both a wild-type and mutant allele (HCT116-P, Parent). Cells were seeded at a density of  $3 \times 10^6$  and counted manually 2 and 4 days after seeding. **(b)** Propidium iodide flow cytometric cell cycle analysis of all three  $\beta$ -catenin HCT116 cell lines.

| a<br>Major EMT factor<br>(normalized to <i>GAPDH</i> ) |              | b<br>EMT hallmark |              |
|--------------------------------------------------------|--------------|-------------------|--------------|
| Gene                                                   | F.C. (MT/WT) | Gene              | F.C. (MT/WT) |
| TWIST1                                                 | 1.260202     | LAMA3             | -3.48248     |
| SNAI1                                                  | 1.227645     | LAMC2             | -2.67062     |
| SNAI2                                                  | 2.114922     | SCG2              | -2.35741     |
| ZEB1                                                   | 2.107306     | RGS4              | -2.30539     |
|                                                        |              | ID2               | -2.27408     |
|                                                        |              | MATN2             | -1.96483     |
|                                                        |              | CD44              | -1.90887     |
|                                                        |              | EFEMP2            | -1.73006     |
|                                                        |              | FUCA1             | -1.72227     |
|                                                        |              | GADD45A           | -1.64045     |
|                                                        |              | PLAUR             | -1.6369      |
|                                                        |              | ACTA2             | -1.60321     |
|                                                        |              | VEGFA             | -1.58174     |
|                                                        |              | PLOD3             | -1.56025     |
|                                                        |              | DPYSL3            | -1.53545     |
|                                                        |              | CYR61             | -1.52886     |
|                                                        |              | TNFAIP3           | 1.509536     |
|                                                        |              | IL8               | 1.523821     |
|                                                        |              | RHOB              | 1.543268     |
|                                                        |              | FERMT2            | 1.546939     |
|                                                        |              | COL6A3            | 1.578306     |
|                                                        |              | TGM2              | 1.618568     |
|                                                        |              | SPP1              | 1.698225     |
|                                                        |              | DKK1              | 1.821872     |
|                                                        |              | CAP2              | 2.282853     |
|                                                        |              | VCAN              | 2.330703     |
|                                                        |              | MSX1              | 3.179599     |
|                                                        |              | VIM               | 7.576687     |

**Supplementary Figure S3.** Identification of EMT-related genes showing differential expression in HCT116-MT cells, compared to HCT116-WT cells in the microarray data **(a)** The expression of four main EMT factors (*SNAI1*, *SNAI2*, *ZEB1*, and *TWIST1*) was analyzed using microarray data by normalizing them to *GAPDH* expression. **(b)** 1,507 DEGs obtained from microarray data were compared to a set of 200 EMT-related genes obtained from KEGG database. Twenty-eight EMT-related genes were significantly changed in HCT116-MT cells, compared to HCT116-WT cells.

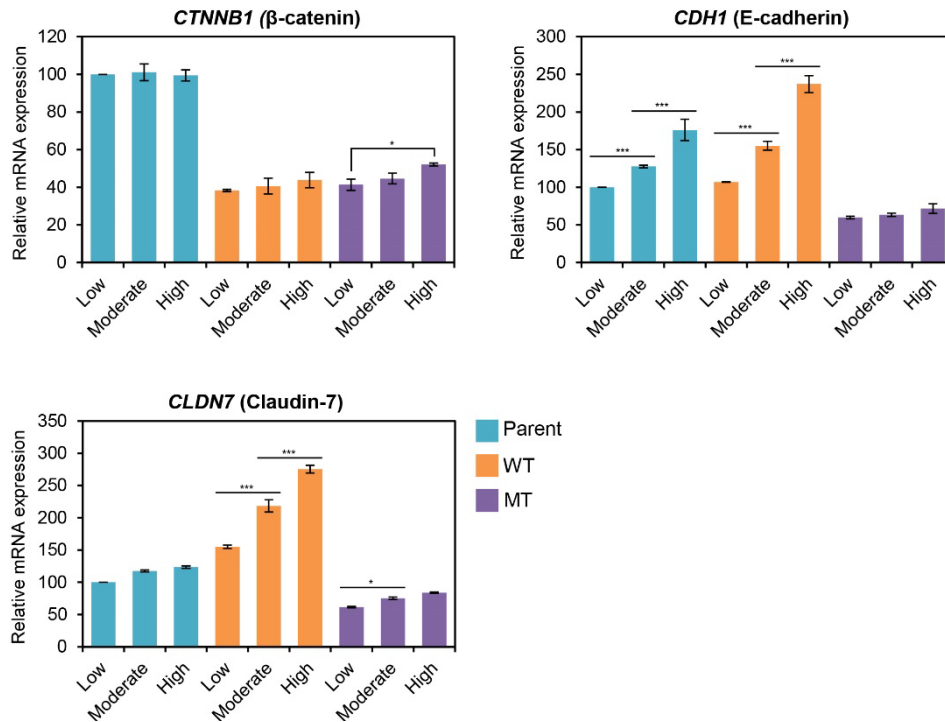

**Supplementary Figure S4.** HCT116-P, HCT116-MT, and HCT116-WT cells show distinct patterns of cell density-dependent  $\beta$ -catenin, Claudin-7, and E-cadherin mRNA expression. The mRNA expression levels of  $\beta$ -catenin, Claudin-7, and E-cadherin were measured by qRT-PCR in all three  $\beta$ -catenin HCT116 cell lines at low, moderate, and high cell density. Error bars represent the SD of the mean of three independent experiments. One-way analysis of variance (ANOVA) with a post-hoc test (Bonferroni) was performed to compare multiple means. \* $P < 0.01$ , \*\* $P < 0.001$ , \*\*\* $P < 0.0001$ . Statistical significance between low (L) and moderate (M) cell densities, and M and high (H) cell densities is shown. Statistical significance between L and H is shown when there is no statistical significance between L and M or M and H.

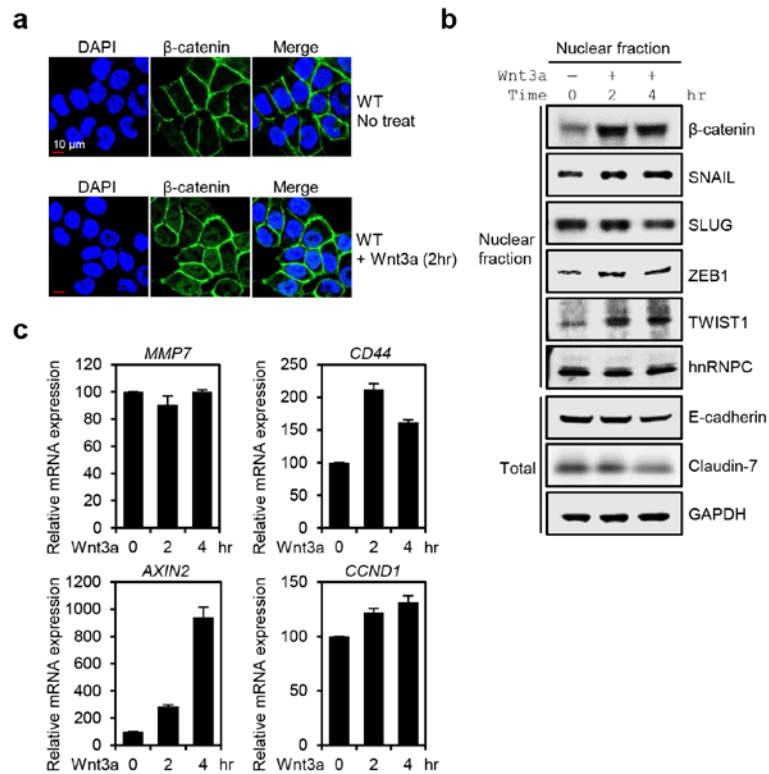

**Supplementary Figure S5.** Wnt3a treatment induced translocation of  $\beta$ -catenin and EMT transcription factors into the nucleus, as well as loss of E-cadherin and Claudin-7, accompanying transcriptional activation of downstream target genes of Wnt/ $\beta$ -catenin signaling in HCT116-WT cells. **(a)** Immunofluorescence microscopy analysis of HCT116-WT cells with or without 2-hour Wnt3a treatment. **(b)** Western blotting analysis of  $\beta$ -catenin, SNAIL, SLUG, ZEB1, TWIST1, E-cadherin, and Claudin-7 using the nuclear fraction of HCT116-WT cells treated with Wnt3a for 2 and 4 hours. **(c)** qPCR analysis of *MMP7*, *CD44*, *AXIN2*, and *CCND1* in HCT116-WT cells treated with Wnt3a for 2 and 4 hours. Error bars represent the standard deviation (SD) of the mean of two independent experiments.

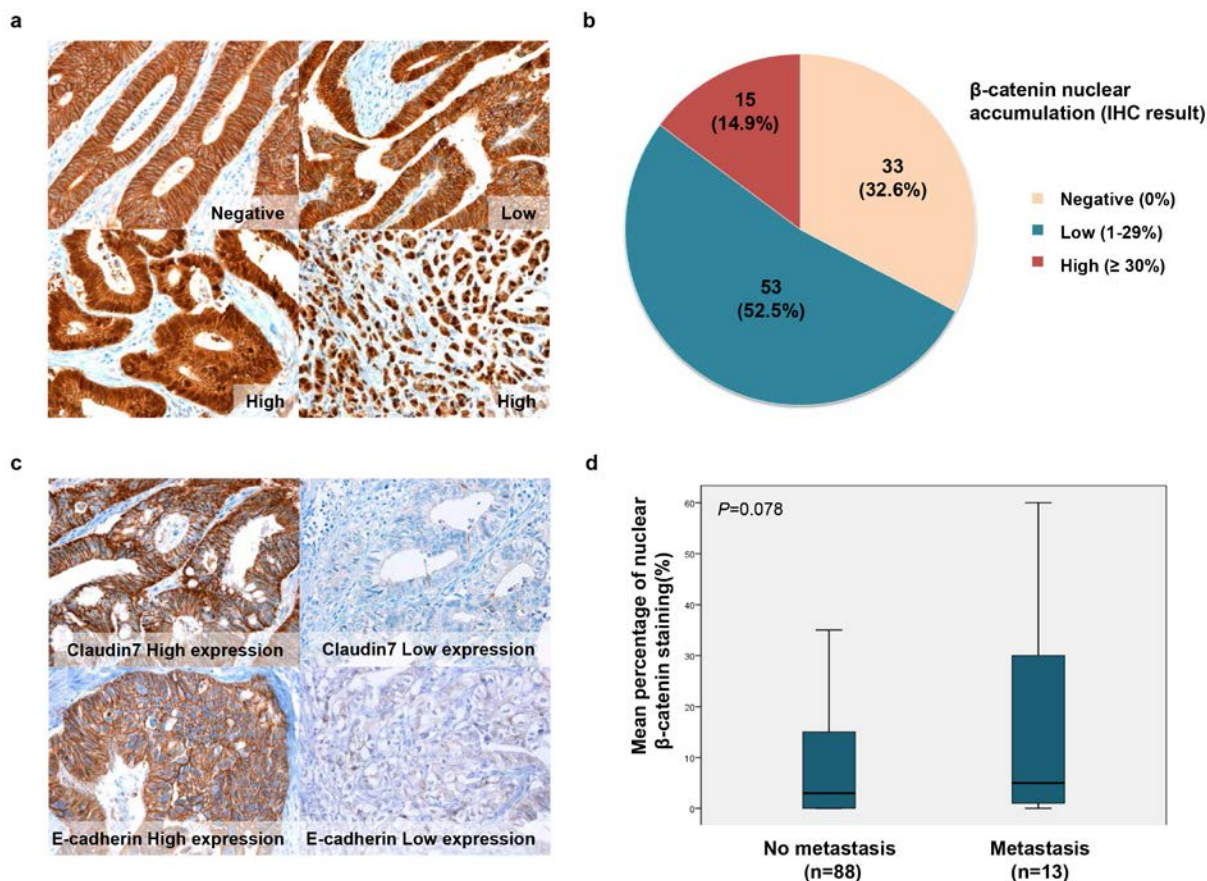

**Supplementary Figure S6.** Expression of nuclear  $\beta$ -catenin, Claudin-7, and E-cadherin in colorectal cancer (CRC) tissues. **(a)** Representative immunohistochemical analysis of CRC tissues with negative, low, or high nuclear  $\beta$ -catenin expression. Nuclear  $\beta$ -catenin expression was classified as negative (detected 0% of tumor cells), low (detected in 1–29% of tumor cells), or high (detected in  $\geq 30\%$  of tumor cells). **(b)** Proportion of the three nuclear  $\beta$ -catenin expression groups identified in our cohort of 101 CRC tumor samples. **(c)** Representative immunohistochemical analysis of CRC tissues with low or high expression of Claudin-7 and E-cadherin. If the H-score (see Materials and Methods) of Claudin-7 or E-cadherin was  $>200$ , the sample was classified as high expression (left, upper and lower), and if the H-score  $\leq 200$ , the sample was classified as low expression (right, upper and lower). **(d)** The mean percentage of nuclear  $\beta$ -catenin-staining in CRC samples that displayed metastasis after operation and in those that did not.



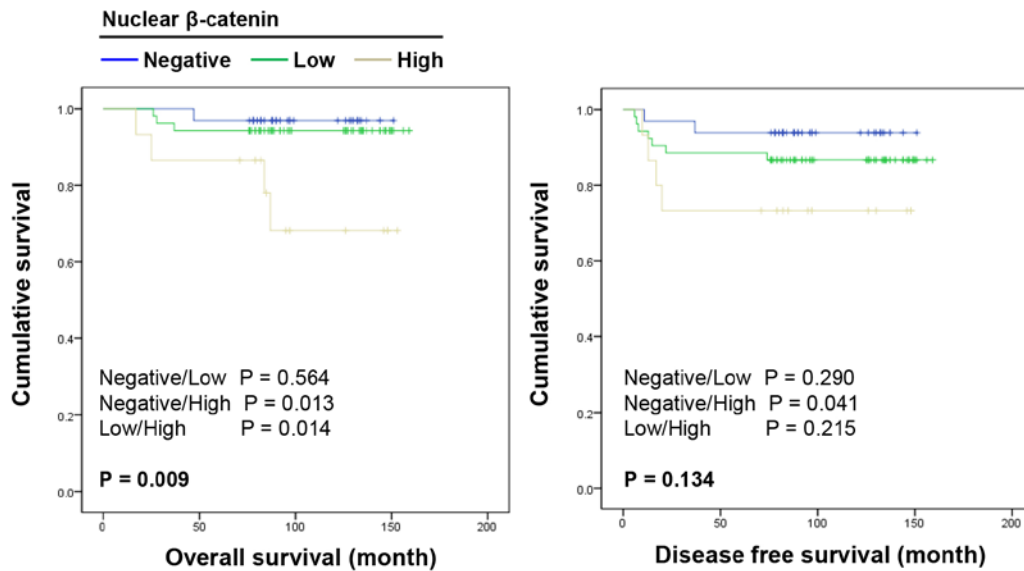

**Supplementary Figure S7.** Kaplan–Meier analysis of 101 CRC patients according to nuclear  $\beta$ -catenin expression. Using 101 CRCs, cases with no nuclear  $\beta$ -catenin expression ( $n = 33$ ), cases with low nuclear  $\beta$ -catenin expression ( $n = 53$ ), and cases with high nuclear  $\beta$ -catenin expression ( $n = 15$ ) were subjected to the overall survival ( $P = 0.009$ ) and disease-free survival ( $P = 0.134$ ) analysis.

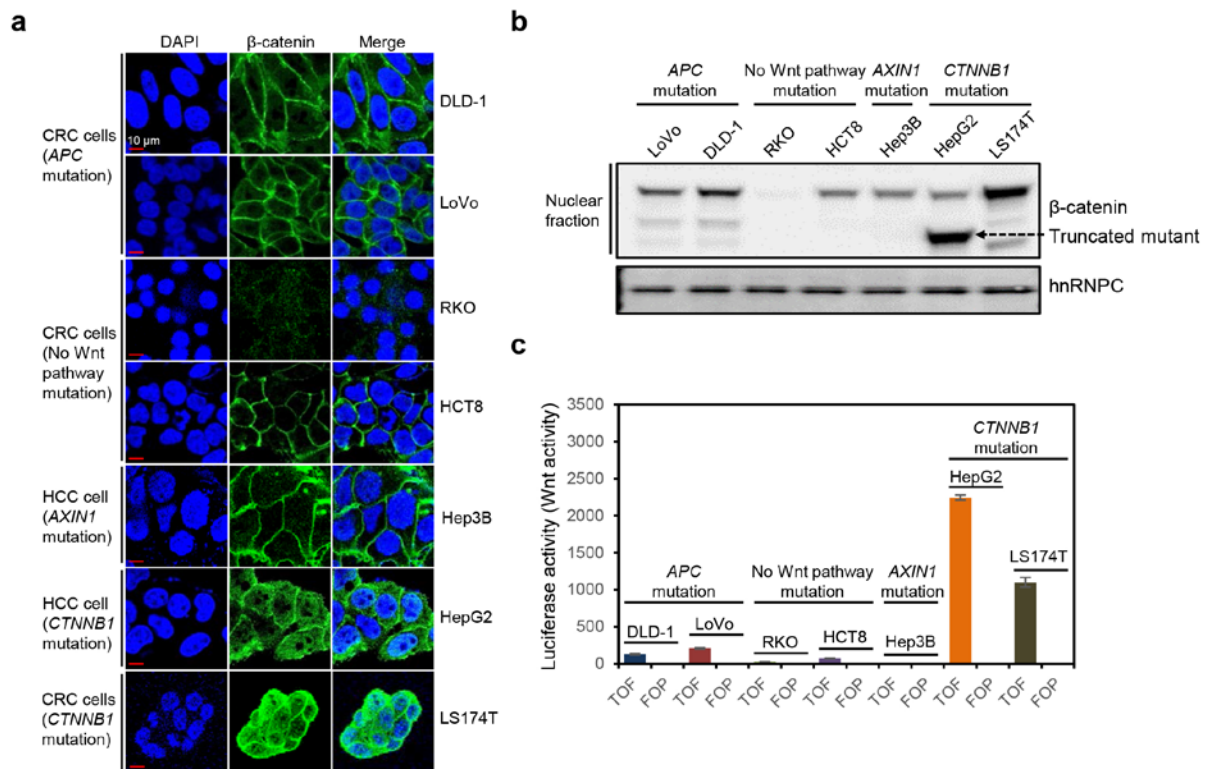

**Supplementary Figure S8.** Localization and nuclear expression of  $\beta$ -catenin, and Wnt pathway activity in cell lines with Wnt pathway related mutations or not. **(a,b)** Immunofluorescence microscopy and western blotting analysis of  $\beta$ -catenin in two APC mutant CRC cell lines (DLD-1 and LoVo), CRC cell lines with no Wnt pathway related mutations (RKO and HCT8), a hepatocellular carcinoma (HCC) cell line with *AXIN1* mutation (Hep3B), a HCC cell line with *CTNNB1* mutation (HepG2), and a CRC cell line with *CTNNB1* mutation (LS174T). Nuclear fraction of cell lysates was used for western blotting analysis. Black arrow indicates mutant  $\beta$ -catenin. **(c)** WNT pathway activity was measured by TOP/FOP luciferase reporter assay. Error bars represent the standard deviation (SD) of the mean of two independent experiments.

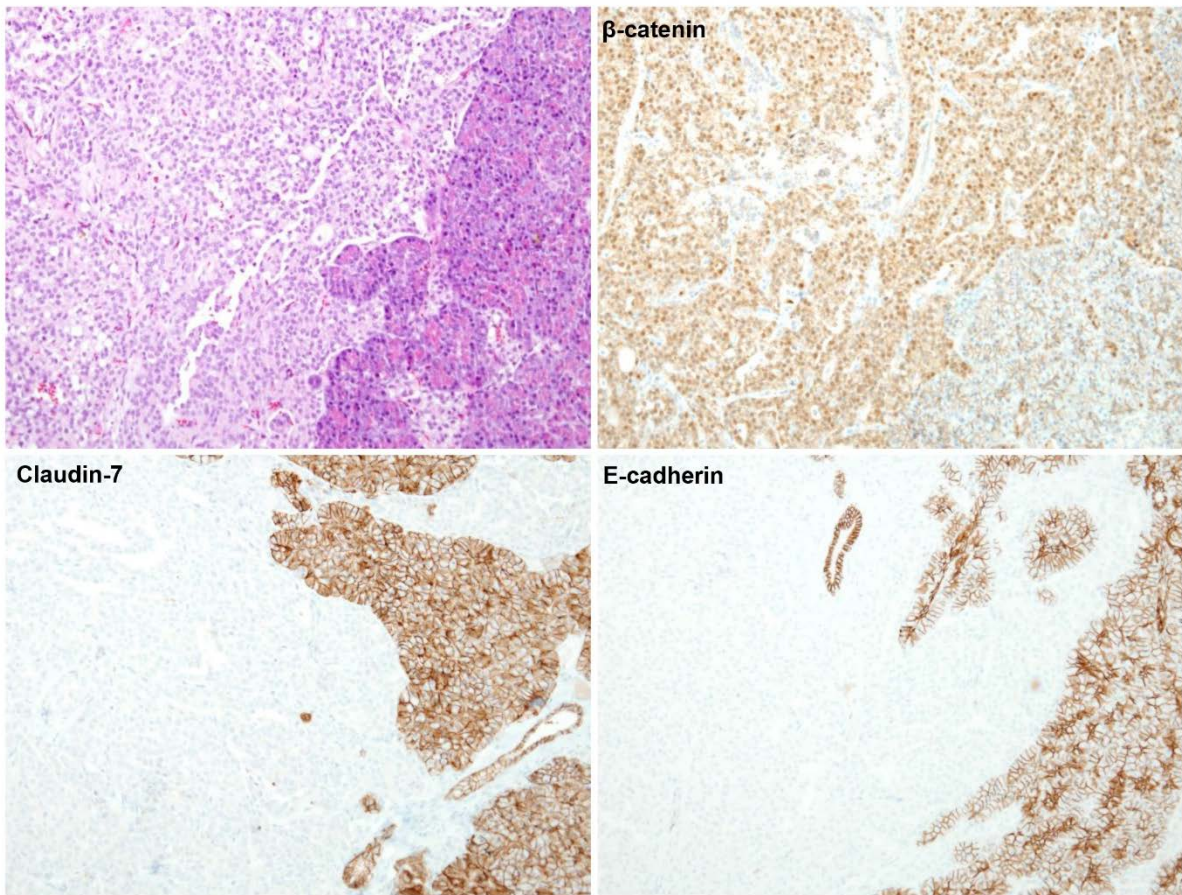

**Supplementary Figure S9.** Solid-pseudopapillary neoplasm (SPN) tissues show specific and strong nuclear  $\beta$ -catenin expression, accompanied by complete loss of both E-cadherin and Claudin-7 expression. Expression of  $\beta$ -catenin, E-cadherin, and Claudin-7 was measured by immunohistochemistry in 15 SPN samples. Representative protein-specific and hematoxylin and eosin staining (H&E) results are shown.

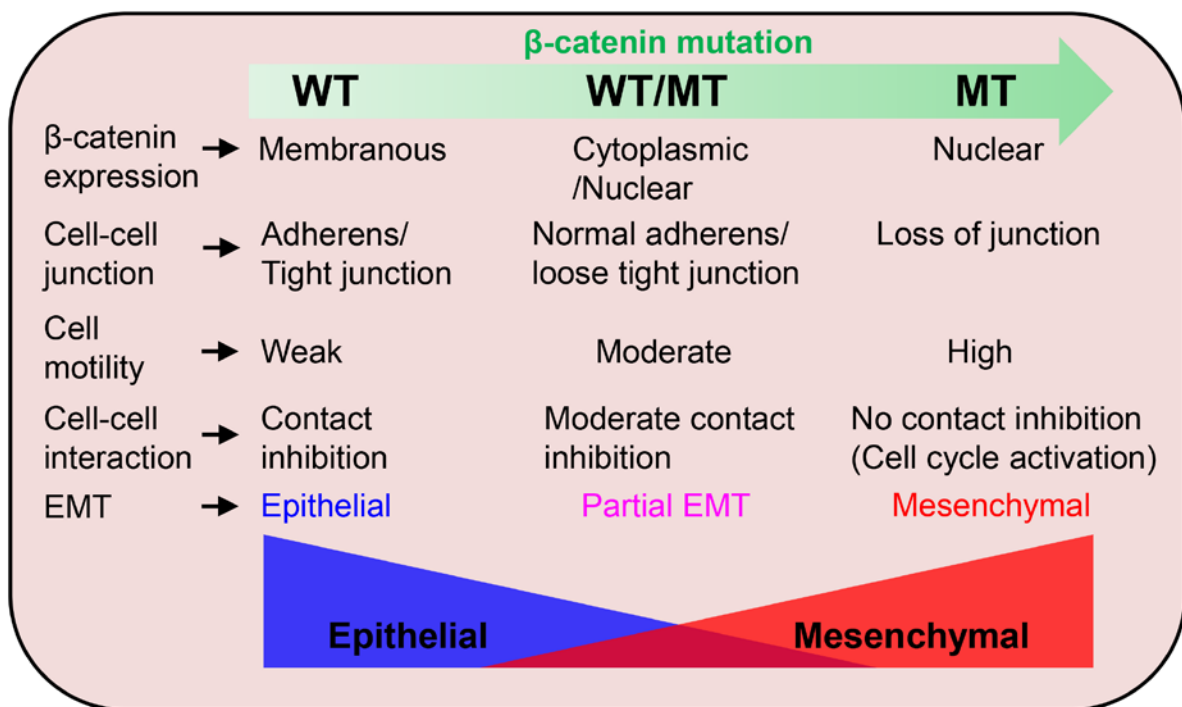

**Supplementary Figure S10.** Model describing the relationship between  $\beta$ -catenin activation status and EMT progression in CRCs.

**Supplementary Table S1. siRNA sequences against the four EMT factors**

| <b>Gene</b>   | <b>siRNA sequence</b>            |
|---------------|----------------------------------|
| <i>SNAI1</i>  | 5'- GAUGCAGUCCGCUCCAUU d(UU)-3'  |
| <i>SNAI2</i>  | 5'- GAGCAAUCAAGCAGAUCAU d(UU)-3' |
| <i>ZEB1</i>   | 5'- CGCUCUGUUGAAGGCUGGA d(UU)-3' |
| <i>TWIST1</i> | 5'- GTGTATGTGCGCCAAAGTA d(UU)-3' |

**Supplementary Table S2. Pathway analysis of up- or down-regulated genes (|fold change|>1.5) in HCT116-MT cells compared to HCT116-WT cells**

| Pathway analysis of down-regulated genes |                                       |          |           |
|------------------------------------------|---------------------------------------|----------|-----------|
| Category                                 | Term                                  | P-Value  | Benjamini |
| KEGG_PATHWAY                             | Antigen processing and presentation   | 5.00E-09 | 7.80E-07  |
| KEGG_PATHWAY                             | Cell adhesion molecules (CAMs)        | 1.00E-05 | 7.90E-04  |
| KEGG_PATHWAY                             | Type I diabetes mellitus              | 1.70E-05 | 8.80E-04  |
| KEGG_PATHWAY                             | Allograft rejection                   | 3.00E-05 | 1.20E-03  |
| KEGG_PATHWAY                             | Graft-versus-host disease             | 5.90E-05 | 1.80E-03  |
| KEGG_PATHWAY                             | Lysosome                              | 9.80E-05 | 2.50E-03  |
| KEGG_PATHWAY                             | Viral myocarditis                     | 4.10E-04 | 9.10E-03  |
| KEGG_PATHWAY                             | Autoimmune thyroid disease            | 5.20E-04 | 1.00E-02  |
| KEGG_PATHWAY                             | Systemic lupus erythematosus          | 6.60E-04 | 1.10E-02  |
| KEGG_PATHWAY                             | Other glycan degradation              | 5.50E-03 | 8.20E-02  |
| KEGG_PATHWAY                             | Small cell lung cancer                | 4.30E-02 | 4.60E-01  |
| KEGG_PATHWAY                             | ECM-receptor interaction              | 4.30E-02 | 4.60E-01  |
| KEGG_PATHWAY                             | Asthma                                | 4.50E-02 | 4.50E-01  |
| KEGG_PATHWAY                             | Tight junction                        | 4.90E-02 | 4.50E-01  |
| Pathway analysis of up-regulated genes   |                                       |          |           |
| Category                                 | Term                                  | P-Value  | Benjamini |
| KEGG_PATHWAY                             | Ribosome                              | 9.20E-06 | 1.30E-03  |
| KEGG_PATHWAY                             | Spliceosome                           | 1.50E-03 | 1.10E-01  |
| KEGG_PATHWAY                             | Cell cycle                            | 4.50E-03 | 1.90E-01  |
| KEGG_PATHWAY                             | Purine metabolism                     | 7.60E-03 | 2.40E-01  |
| KEGG_PATHWAY                             | DNA replication                       | 8.10E-03 | 2.10E-01  |
| KEGG_PATHWAY                             | Limonene and pinene degradation       | 1.20E-02 | 2.50E-01  |
| KEGG_PATHWAY                             | Pancreatic cancer                     | 1.30E-02 | 2.40E-01  |
| KEGG_PATHWAY                             | Pyrimidine metabolism                 | 1.90E-02 | 2.90E-01  |
| KEGG_PATHWAY                             | Proteasome                            | 2.40E-02 | 3.30E-01  |
| KEGG_PATHWAY                             | Fatty acid elongation in mitochondria | 3.00E-02 | 3.60E-01  |

**Supplementary Table S3. The clinicopathologic features of 101 CRCs according to nuclear  $\beta$ -catenin expression status**

|                                   |                         | <b><math>\beta</math>-catenin nuclear accumulation</b> |       |               |       |               |       | <b>Total</b> | <b>p-value</b> |
|-----------------------------------|-------------------------|--------------------------------------------------------|-------|---------------|-------|---------------|-------|--------------|----------------|
|                                   |                         | <b>Absent</b>                                          |       | <b>Low</b>    |       | <b>High</b>   |       |              |                |
|                                   |                         | n = 33, 32.6%                                          |       | n = 53, 52.5% |       | n = 15, 14.9% |       |              |                |
| <b>Age</b>                        |                         | 60.18±11.15                                            |       | 57.64±11.13   |       | 61.07±11.52   |       | 101          | 0.449          |
| <b>Sex</b>                        | Male                    | 16                                                     | 48.5% | 27            | 50.9% | 8             | 53.3% | 51           | 0.948          |
|                                   | Female                  | 17                                                     | 51.5% | 26            | 49.1% | 7             | 46.7% | 50           |                |
| <b>Location</b>                   | Right side              | 17                                                     | 51.5% | 14            | 26.4% | 5             | 33.3% | 36           | 0.060          |
|                                   | Left side               | 16                                                     | 48.5% | 39            | 73.6% | 10            | 66.7% | 65           |                |
| <b>MSI</b>                        | MSS and MSI low         | 27                                                     | 81.8% | 52            | 98.1% | 14            | 93.3% | 93           | 0.013          |
|                                   | MSI high                | 6                                                      | 18.2% | 1             | 1.9%  | 1             | 6.7%  | 8            |                |
| <b>Pre-operative CEA level</b>    | ≤5ng/ml                 | 27                                                     | 81.8% | 35            | 66.0% | 11            | 73.3% | 73           | 0.281          |
|                                   | >5ng/ml                 | 6                                                      | 18.2% | 18            | 34.0% | 4             | 26.7% | 28           |                |
| <b>Gross type</b>                 | Exophytic               | 28                                                     | 84.8% | 38            | 71.7% | 11            | 73.3% | 77           | 0.364          |
|                                   | Non exophytic           | 5                                                      | 15.2% | 15            | 28.3% | 4             | 26.7% | 24           |                |
| <b>Size</b>                       | <5cm                    | 12                                                     | 36.4% | 33            | 62.3% | 5             | 33.3% | 50           | 0.026          |
|                                   | ≥5cm                    | 21                                                     | 63.6% | 20            | 37.7% | 10            | 66.7% | 51           |                |
| <b>Pathologic diagnosis</b>       | Adenocarcinoma          | 31                                                     | 93.9% | 51            | 96.2% | 13            | 86.7% | 95           | 0.288          |
|                                   | Mucinous adenocarcinoma | 1                                                      | 3.0%  | 1             | 1.9%  | 2             | 13.3% | 4            |                |
|                                   | Medullary carcinoma     | 1                                                      | 3.0%  | 1             | 1.9%  | 0             | 0.0%  | 2            |                |
| <b>Metastasis after operation</b> | Absent                  | 31                                                     | 93.9% | 46            | 86.8% | 11            | 73.3% | 88           | 0.142          |
|                                   | Present                 | 2                                                      | 6.1%  | 7             | 13.2% | 4             | 26.7% | 13           |                |
| <b>E-cadherin</b>                 | High expression         | 25                                                     | 75.8% | 39            | 73.6% | 7             | 46.7% | 71           | 0.093          |
|                                   | Low expression          | 8                                                      | 24.2% | 14            | 26.4% | 8             | 53.3% | 30           |                |
| <b>Claudin7</b>                   | High expression         | 20                                                     | 60.6% | 34            | 64.2% | 7             | 46.7% | 61           | 0.474          |
|                                   | Low expression          | 13                                                     | 39.4% | 19            | 35.8% | 8             | 53.3% | 40           |                |

## Supplementary Information (Blots)

Fig. 1C

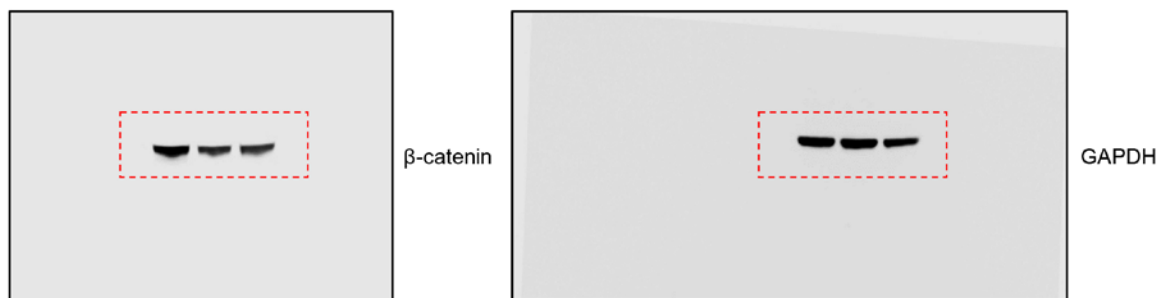

Fig. 1E

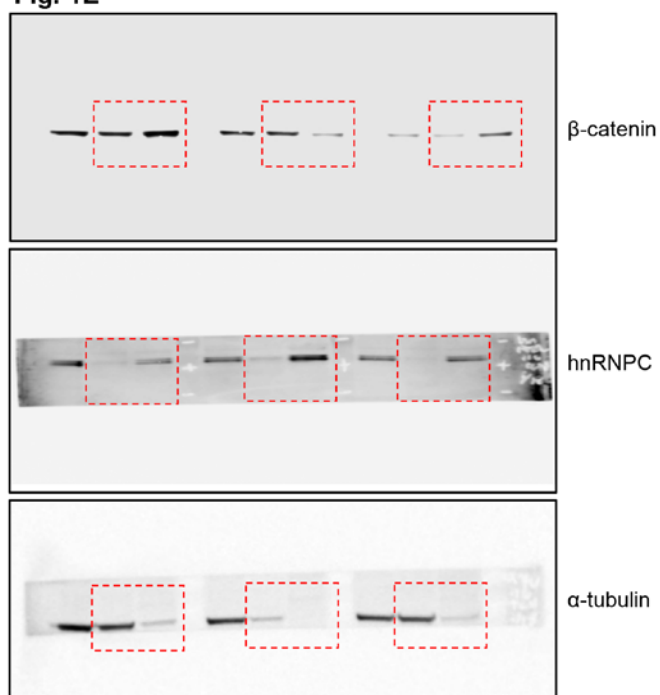



**Fig. 3A**

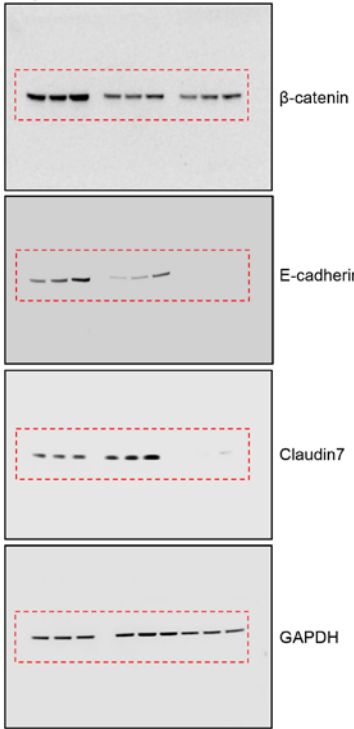

**Fig. 4A**

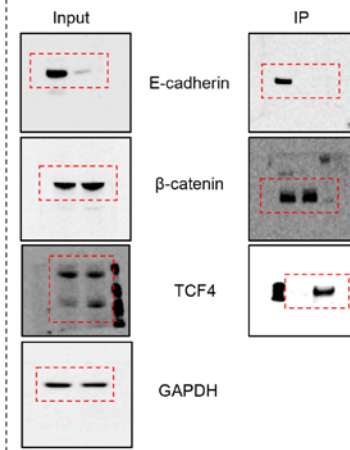

**Fig. 4F**

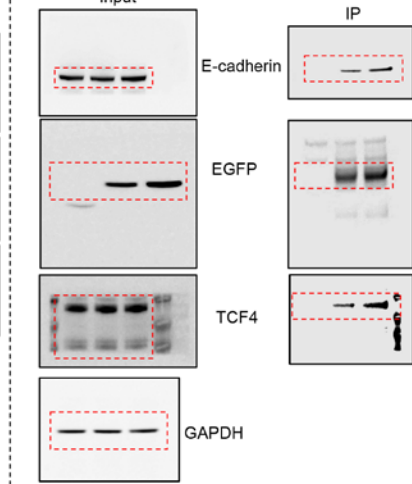

**Fig. 4C**

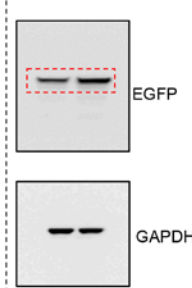

**Fig. 4I**

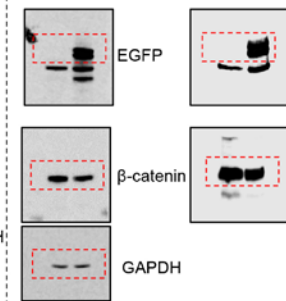

**Fig. 4J**

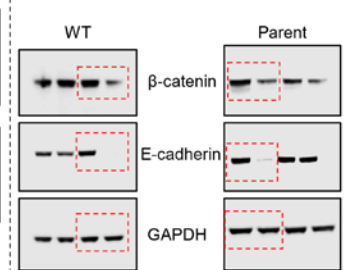

Fig. 6B

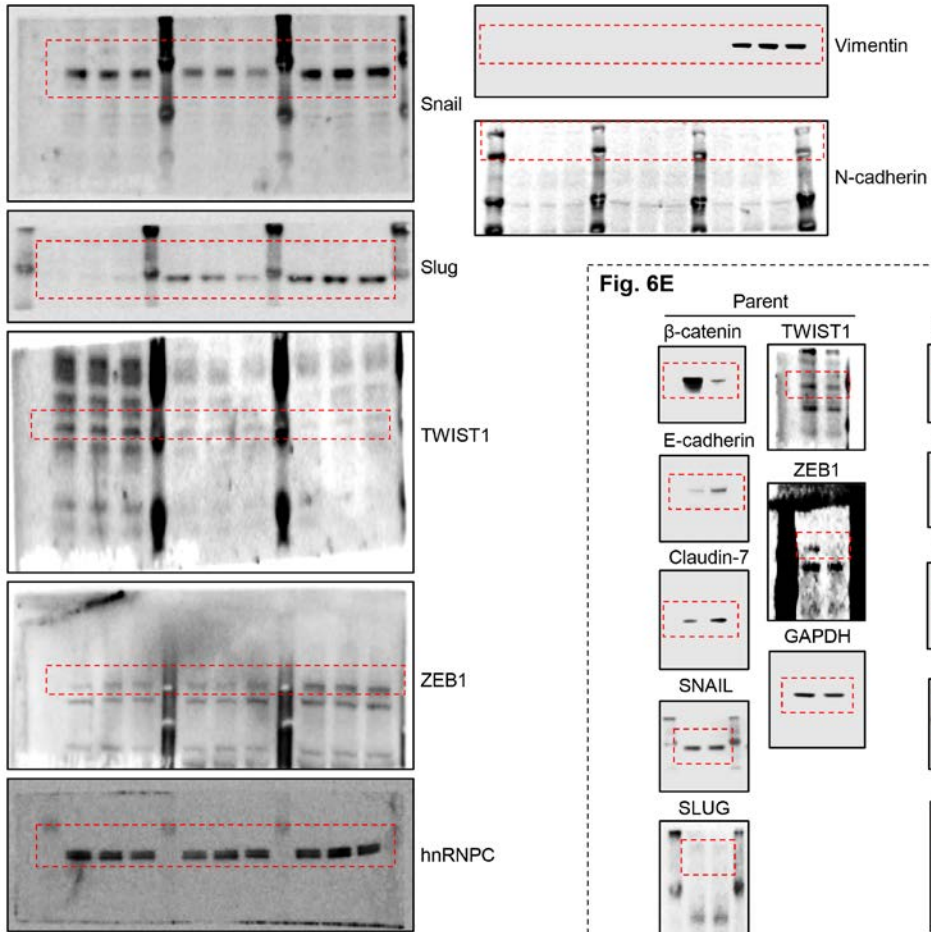

Fig. 6E

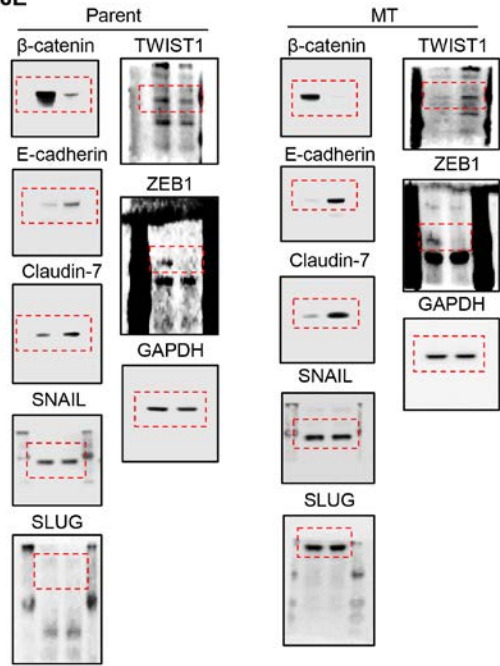

**Fig. 6F**

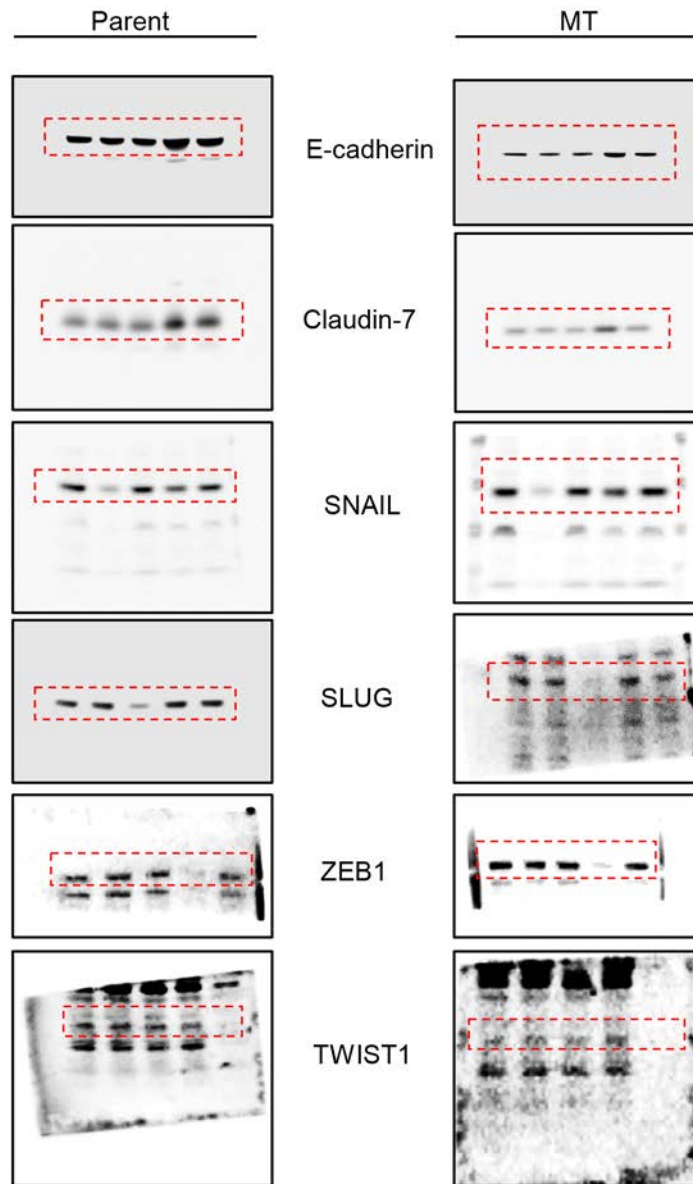

**Fig. 7A**

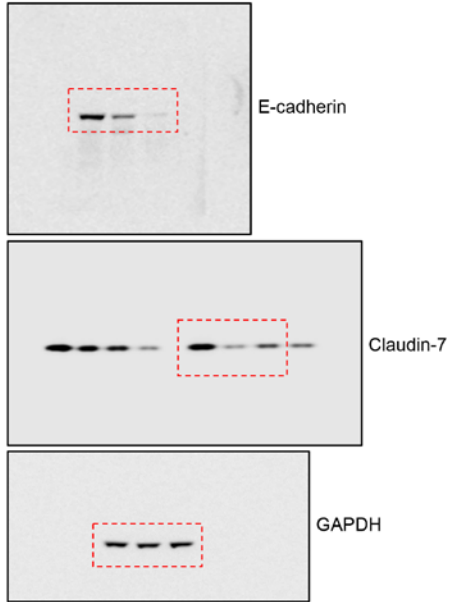

**Fig. 8A**

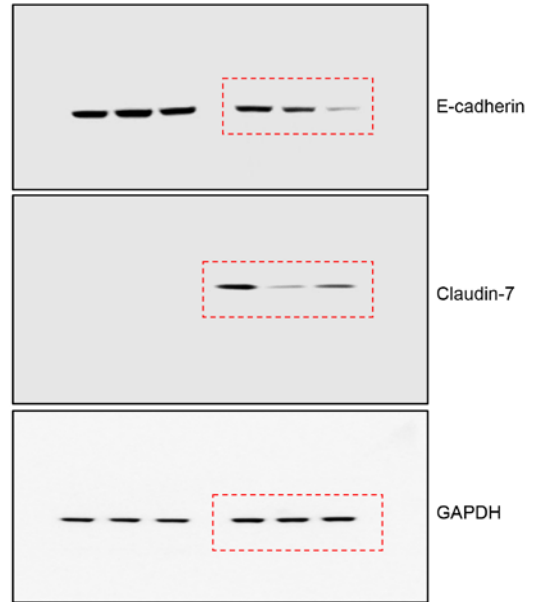

Supplementary Fig. 5B

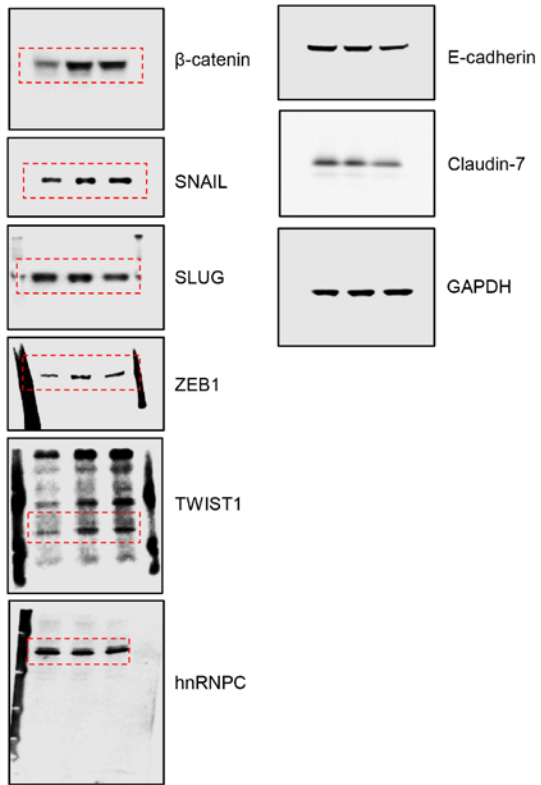

Supplementary Fig. 8

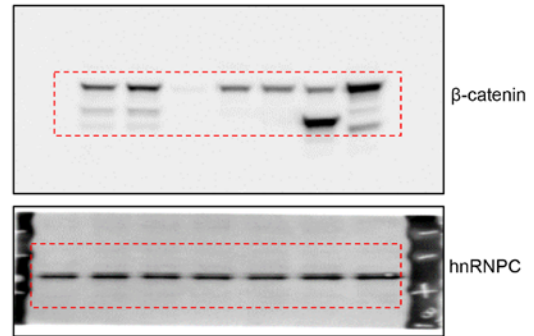

Supplement: 41598_2019_54890_MOESM1_ESM.pdf [file 41598_2019_54890_MOESM1_ESM.pdf]
